# Supplementary material
Source: Springer Nature journal article supplement (https://www.springermedizin.de/resource/supplementary/12933_2004_25_MOESM1_ESM.pdf/9539438)

# METABOLIC SYNDROME

HYPERGLYCEMIA

HYPERTENSION

T2DM / IGT.

hs-CRP

MICROALBUMINURIA

HYPERURICEMIA

PAI-1

IR

PCOS

Fibrinogen

IS CENTRAL TO CHD.

ENDOTHELIOPATHY

ROS

$\wedge$  ROS

Visceral Obesity

$\wedge$ TRIGS. dec. HDL  $\wedge$ small dense LDL

HYPERLIPIDEMIA

Hyperinsulinemia

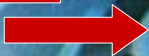

$\downarrow$ eNOS

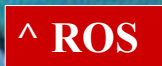

Decreased NO  
 $\wedge$  [O<sub>2</sub><sup>-</sup>]

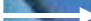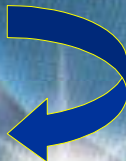

Supplement: MOESM1 [file 9539438]
